# Supplementary material for: Machine Learning-based Chemotoxicity Predictions in Patients with Colorectal Cancer: Integrating Race, Geospatial Social Determinants of Health, and Biological Aging
Source: Research Square preprint supplement (doi:10.21203/rs.3.rs-6628340/v1), 2025-05-19
Supplement: Supplementary file 1 [file 1976dbc95bd4b05dd7d88f63.docx]

**Supplementary Table 1. Factors related to Global Chemotoxicity Incidence** **in the Whole Dataset (N = 1,735).**

|  | | **Global Chemotoxicity Incidence (Yes/No)** | | ***F or t/p*** |
| --- | --- | --- | --- | --- |
| **Yes (n=977, 56.3%)** | **No (n=758, 43.7%)** |
| **Demographic and Clinical Characteristics at Baseline** | | | | |
| Age (years), mean ± SD (age range) | | 61.4 ± 6.2 (55-71) | 60.5 ± 5.5 (59-89) | 1.5, .104 |
| Biological age (Levine PhenoAge) | | 66.9 ± 8.3 (58-79) | 58.9 ± 8.2 (42-85) | 10.4, .**020** |
| Female (n,%) | | 511 (52.3) | 424 (55.9) | 0.3, .982 |
| Race/Ethnicity (n, %) | | | | |
| Non-Hispanic White | | 573 (58.7) | 495 (65.4) | 15.4, **.019** |
| Non-Hispanic Black | | 386 (39.5) | 246 (32.5) |
| Non-Hispanic Other | | 18 (1.8) | 16 (2.1) |
| **Clinical factors** | | | | |
| Cancer Site (n, %)  Colon only  Rectal only  Colon and Rectal | | 599 (61.3)  290 (29.7)  88 (9.0) | 453 (59.8)  229(30.2)  76 (10.0) | 1.1, .412 |
| Cancer stages (n, %) II  III | | 601(61.5)  376(38.5) | 476 (62.8)  282 (37.2) | 0.3, .999 |
| Modified Comorbidity Index (>2) (n,%) | | 578 (59.2) | 375 (49.5) | 15.4, .**014** |
| Body Mass Index (BMI), kg/m2, mean ± SD | 30.5 (0.5) | | 32.5 (0.4) | 0.1, .995 |
| BMI, kg/m2 (n, %) <25 | | 332 (34.0) | 261 (34.5) | 19.8, .**043** |
| 25 < BMI <30 | | 293 (30.0) | 250(33.0) |
| 30 < BMI | | 352 (36.0) | 247(32.5) |
| WBC (k/ul), normal (4 -11k/ul), mean ± SD | | 16.4 (4.5) | 12.9 (6.6) | 25.9,**<.001** |
| CRP (mg/dl), normal (< 0.3mg/dl), mean ± SD | | 11.3 (4.2) | 4.5 (6.5) | 32.5, **.001** |
| Neutrophil: lymphocyte ratio (NLR) (n, %)  Lower than normal range  Normal range (1 to 3)  Higher than normal range | | 220 (22.5)  440 (45.0)  317 (32.5) | 182 (24.0)  371 (49.0)  205(27.0) | 11.9, **.004** |
| Platelet: Lymphocyte ratio (PLR) (n, %)  Lower than normal range  Normal range (80 to 150)  Higher than normal range | | 191 (19.5)  489 (50.0)  297 (30.5) | 144 (19.0)  383 (50.5)  231 (30.5) | 0.3, .688 |
| Previous cancer treatment history (n, %) | | | | |
| Radiation | | 142 (14.5) | 69 (9.1) | 20.1, **.041** |
| Immunotherapy | | 53 (5.4) | 13(1.7) |  |
| GI tract surgery | | 804 (82.3) | 607 (80.2) |  |
| Cancer Health Behaviors (Yes),(n,%) | | | | |
| Current Smoking Status | | 119 (12.2) | 114 (15.1) | 2.3, .159 |
| Current Heavy Alcohol Use | | 151 (15.5) | 140 (18.5) | 0.9, .598 |
| Regular Physical Activity | | 215 (22.0) | 348 (45.9) | 24.3, .**039** |
| **Social Determinants of Health (SDOH) variables available from EHR (n, %)** | | | | |
| Marital status | |  |  | 11.3, .**014** |
| Married/Partnered | | 586 (60) | 318(42) |
| Divorced/Widowed/Single | | 391 (40) | 440 (58) |
| Primary Insurance Types: Private  Medicare/Medicaid | | 482 (49.3)  495 (50.7) | 366 (48.3)  392 (51.7) | 0.15, .611 |
| Area Deprivation Index (ADI), Tertile: 0-33  34-66  67-100 | | 335 (34.3)  288 (29.5)  354 (36.2) | 266 (29.8)  312 (41.1)  220 (29.1) | 13.4, .**003** |
| Employment Status: Employed  Unemployed  Retired | | 444 (45.4)  276 (28.3)  257 (26.3) | 368(48.5)  217 (28.6)  173 (22.9) | 0.3, .699 |

Note: Characteristics of variables were described using means with standard deviation (SD) for continuous variables and numbers (%) for categorical variables. *P*-values in bold if they are <.05, as this is considered the statistical significance level, based on either using an ANOVA or a Chi-square test.

**Supplementary Table 2. Factors related to GI Chemotoxicity Incidence in the Whole Dataset (N = 1,735).**

|  | **GI Chemotoxicity Incidence (Yes/No)** | | | ***F or t/p*** |
| --- | --- | --- | --- | --- |
| **Yes (n = 707, 40.7%)** | | **No (n= 1,028, 59.3%)** |
| **Demographic and Clinical Characteristics at Baseline** | | | | |
| Age (years), mean ± SD (age range) | 61.5 ± 6.5 (55-89) | | 65.5 ± 4.5 (34-72) | 3.4**, .**091 |
| Biological age (Levine PhenoAge) | 65.7 ± 6.1 (55-87) | | 58.9 ± 4.7 (44-74) | 11.9, .035 |
| Female (n,%) | 362 (51.2) | | 563 (54.8) | 0.3, .982 |
| Race/Ethnicity (n, %) | | | | |
| Non-Hispanic White | 394 (55.7) | | 645 (62.8) | 10.9, **.031** |
| Non-Hispanic Black | 260(36.8) | | 345 (33.6) |
| Non-Hispanic Other | 53 (7.5) | | 38 (3.6) |
| **Clinical factors** | | | | |
| Cancer Site (n, %)  Colon only  Rectal only  Colon and Rectal | 491 (69.5)  238 (33.6)  72 (10.2) | | 715 (69.5)  345 (33.6)  103 (10.0) | 2.2, .598 |
| Cancer stages (n, %) II  III | 492 (69.6)  215 (30.4) | | 715 (69.5)  313 (30.5) | 0.3, .875 |
| Modified Comorbidity Index (>2) (n,%) | 474 (67.0) | | 555 (54.0) | 20.2, .**016** |
| Body Mass Index (BMI), kg/m2, mean ± SD | 30.5 (0.4) | | 32.4 (0.4) | 0.2, .991 |
| BMI, kg/m2 (n, %) <25 | 272 (38.5) | | 345 (33.6) | 24.9, **.006** |
| 25 < BMI <30 | 240 (34.0) | | 395 (38.4) |
| 30 < BMI | 195 (27.5) | | 288 (28.0) |
| WBC (k/ul), normal (4 -11k/ul), mean ± SD | 20.4 (6.1) | | 4.1 (4.5) | 31.2**,<.001** |
| CRP (mg/dl), normal (< 0.3mg/dl), mean ± SD | | 12.9 (5.9) | 5.6 (9.3) | 28.5, **.001** |
| Neutrophil: lymphocyte ratio (NLR) (n, %)  Lower than normal range  Normal range (1 to 3)  Higher than normal range | 392 (55.4)  234 (33.1)  81 (11.5) | | 349 (33.9)  350 (34.1)  329 (32.0) | 24.9, **.024** |
| Platelet: Lymphocyte ratio (PLR) (n, %)  Lower than normal range  Normal range (80 to 150)  Higher than normal range | 227 (32.1)  301 (42.5)  180 (25.4) | | 140 (13.6)  570 (55.4)  319 (31.0) | 1.5 .651 |
| Previous cancer treatment history (n, %) | | | | |
| Radiation | 62 (8.8) | | 114 (11.1) | 0.4., .512 |
| Immunotherapy | 57 (8.1) | | 67 (6.5) |  |
| GI tract surgery | 588 (83.1) | | 847 (82.4) |  |
| Cancer Health Behaviors (Yes),(n,%) | | | | |
| Current Smoking Status | 74 (10.4) | | 88 (8.6) | 0.6, .222 |
| Current Heavy Alcohol Use | 86 (12.1**)** | | 133 (12.9) | 1.5, .539 |
| Regular Physical Activity | 137 (19.4) | | 218 (21.2) | 3.1, .412 |
| **Social Determinants of Health (SDOH) variables available from EHR (n, %)** | | | | |
| Marital status |  | |  | 11.3, .014 |
| Married/Partnered | 424 (60) | | 432 (42) |
| Divorced/Widowed/Single | 283 (40) | | 596 (58) |  |
| Primary Insurance Types  Private  Medicare/Medicaid | 349(49.3)  358 (50.7) | | 497 (48.3)  532 (51.7) | 0.15, .611 |
| Area Deprivation Index (ADI), Tertile: 0-33  34-66  67-100 | 170 (24.1)  317 (44.9)  219 (31.0) | | 264 (25.7)  497 (48.3)  267 (26.0) | 1.5, .146 |
| Employment Status  Employed (full-time or part-time)  Unemployed  Retired | 350(49.5)  244 (34.5)  113 (16.0) | | 485 (47.2)  363 (35.3)  180 (17.5) | 0.5, .454 |

Note: Characteristics of variables were described using means with standard deviation (SD) for continuous variables and numbers (%) for categorical variables. *P*-values in bold if they are <.05, as this is considered the statistical significance level, based on either using an ANOVA or a Chi-square test.

**Supplementary Table 3. Factors related to Hematological Chemotoxicity Incidence in the Whole Dataset (N = 1,735).**

|  | **Hematological Chemotoxicity Incidence (Yes/No)** | | | ***F or t/p*** |
| --- | --- | --- | --- | --- |
| **Yes (n =396, 22.8%)** | | **No (n= 1,339, 77.2%)** |
| **Demographic and Clinical Characteristics at Baseline** | | | | |
| Age (years), mean ± SD (age range) | 66.8 ± 6.9 (35-76) | | 67.7 ± 4.1 (48-89) | 0.5**,** .341 |
| Biological age (Levine PhenoAge) | 67.5 ± 3.9 (37-81) | | 61.2 ± 4.4 (52-89) | 19.2, **.029** |
| Female (n,%) | 219 (55.3) | | 745 (55.6) | 0.3, .982 |
| Race/Ethnicity (n, %) | | | | |
| Non-Hispanic White | 215 (54.3) | | 757 (56.5) | 0.9, .591 |
| Non-Hispanic Black | 132 (33.3) | | 435 (32.5) |
| Non-Hispanic Other | 49 (12.4) | | 147 (11.0) |
| **Clinical factors** | | | | |
| Cancer Site (n, %)  Colon only  Rectal only  Colon and Rectal | 263 (66.5)  127 (32.1)  6 (1.4) | | 850 (63.5)  457 (34.1)  13 (1.0) | 2.2, .598 |
| Cancer stages (n, %) II  III | 282 (71.3)  114 (28.7) | | 944 (70.5)  395 (29.5) | 0.3, .875 |
| Modified Comorbidity Index (>2) (n,%) | 255 (64.4) | | 757 (56.5) | 0.2, 698 |
| Body Mass Index (BMI), kg/m2, mean ± SD | 29.4 (1.3) | | 30.1 (0.9) | 0.2, .991 |
| BMI, kg/m2 (n, %) <25 | 164 (41.5) | | 515 (38.5) | 4.9, .061 |
| 25 < BMI <30 | 108 (27.3) | | 380 (28.4) |
| 30 < BMI | 124 (31.2) | | 444 (33.1) |
| WBC (k/ul), normal (4 -11k/ul), mean ± SD | 2.5 (5.6) | | 7.6 (4.1) | 24.5**, .001** |
| CRP (mg/dl), normal (< 0.3mg/dl), mean ± SD | | 4.5 (6.3) | 5.1 (5.6) | 3.1, .512 |
| Neutrophil: lymphocyte ratio (NLR) (n, %)  Lower than normal range  Normal range (1 to 3)  Higher than normal range | 219 (55.4)  131 (33.1)  46 (11.5) | | 454 (33.9)  457 (34.1)  428 (32.0) | 24.9, **.024** |
| Platelet: Lymphocyte ratio (PLR) (n, %)  Lower than normal range  Normal range (80 to 150)  Higher than normal range | 127 (32.1)  168 (42.5)  101 (25.4) | | 182 (13.6)  742 (55.4)  415 (31.0) | 1.5 .651 |
| Previous cancer treatment history (n, %) | | | | |
| Radiation | 35 (8.8) | | 149 (11.1) | 0.4., .512 |
| Immunotherapy | 32 (8.1) | | 87 (6.5) |  |
| GI tract surgery | 329 (83.1) | | 1103 (82.4) |  |
| Cancer Health Behaviors (Yes),(n,%) | | | | |
| Current Smoking Status | 41 (10.4) | | 115 (8.6) | 0.6, .222 |
| Current Heavy Alcohol Use | 48 (12.1) | | 173 (12.9) | 1.5, .539 |
| Regular Physical Activity | 77 (19.4) | | 284 (21.2) | 3.1, .412 |
| **Social Determinants of Health (SDOH) variables available from EHR (n, %)** | | | | |
| Marital status |  | |  | 3.2, .432 |
| Married/Partnered | 211 (53.2) | | 762 (56.9) |
| Divorced/Widowed/Single | 185 (46.8) | | 577 (43.1) |  |
| Primary Insurance Types  Private  Medicare/Medicaid | 235(59.3)  161(40.7) | | 810 (60.5)  529 (39.5) | 0.3, .888 |
| Area Deprivation Index (ADI), Tertile: 0-33  34-66  67-100 | 95 (24.1)  178 (44.9)  123 (31.0) | | 344 (25.7)  647 (48.3)  348 (26.0) | 1.5, .146 |
| Employment Status  Employed (full-time or part-time)  Unemployed  Retired | 196 (49.5)  137 (34.5)  63 (16.0) | | 632 (47.2)  473 (35.3)  234 (17.5) | 0.5, .454 |

Note: Characteristics of variables were described using means with standard deviation (SD) for continuous variables and numbers (%) for categorical variables. *P*-values in bold if they are <.05, as this is considered the statistical significance level, based on either using an ANOVA or a Chi-square test.
